# Supplementary material for: An asymmetric supercapacitor with excellent cycling performance realized by hierarchical porous NiGa2O4 nanosheets
Source: Royal Society of Chemistry journal article supplement (doi:10.1039/c7ta05493a), 2017-01-01
Supplement: c7ta05493a1.pdf [file c7ta05493a1.pdf]

**Electronic Supplementary Information (ESI)**

**Asymmetric Supercapacitor with Excellent Cycling Performance Realized by Hierarchical Porous NiGa<sub>2</sub>O<sub>4</sub> Nanosheets**

Shude Liu<sup>a</sup>, Kwan San Hui<sup>b,\*</sup>, Kwun Nam Hui<sup>c,\*</sup>, Hai-Feng Li<sup>c</sup>, Kar Wei Ng<sup>c</sup>, Jincheng Xu<sup>c</sup>, Zikang Tang<sup>c</sup>, and Seong Chan Jun<sup>a,\*</sup>

<sup>a</sup>Nano-Electro Mechanical Device Laboratory, School of Mechanical Engineering, Yonsei University, Seoul 120-749, South Korea

<sup>b</sup>School of Mathematics, University of East Anglia, Norwich, NR4 7TJ, United Kingdom

<sup>c</sup>Institute of Applied Physics and Materials Engineering, University of Macau, Avenida da Universidade, Macau, China.

\*E-mail: bizhui@umac.mo (Kwun Nam Hui)

\*E-mail: k.hui@uea.ac.uk (Kwan San Hui)

\*E-mail: scj@yonsei.ac.kr (Seong Chan Jun)

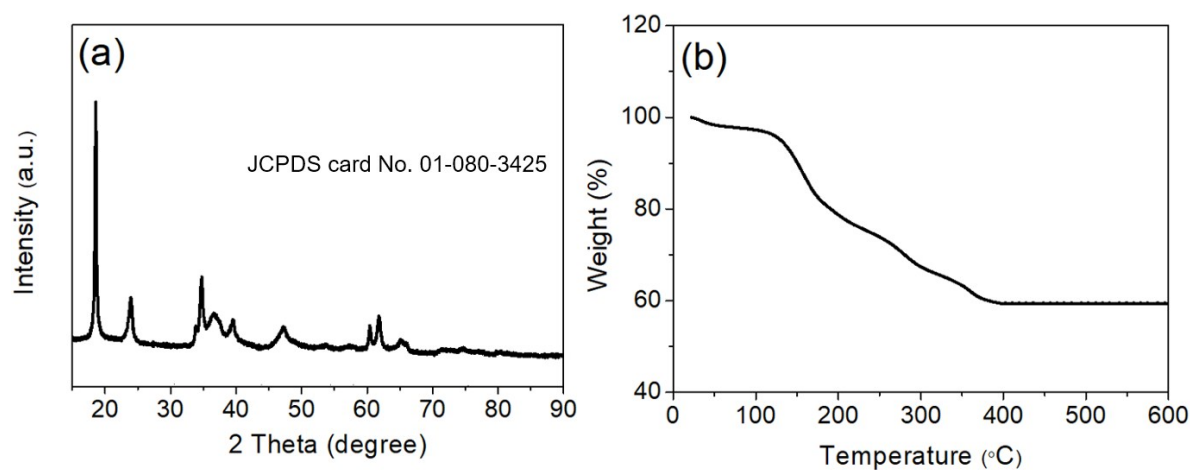

**Figure S1.** (a) XRD pattern and (b) TGA curve of the as-prepared NiGa-precursor.

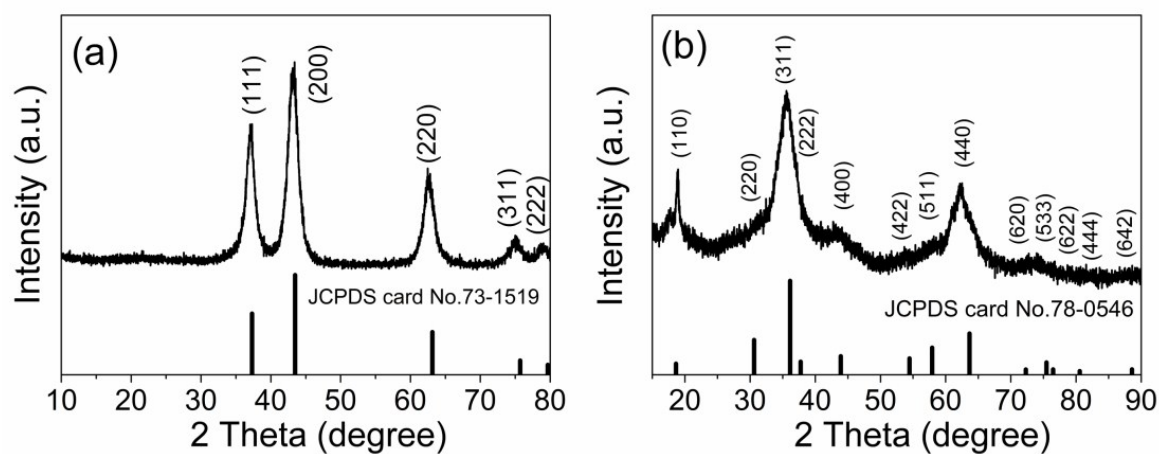

**Figure S2.** Typical XRD patterns of the (a) NiO and (b) NiGa<sub>2</sub>O<sub>4</sub> samples.

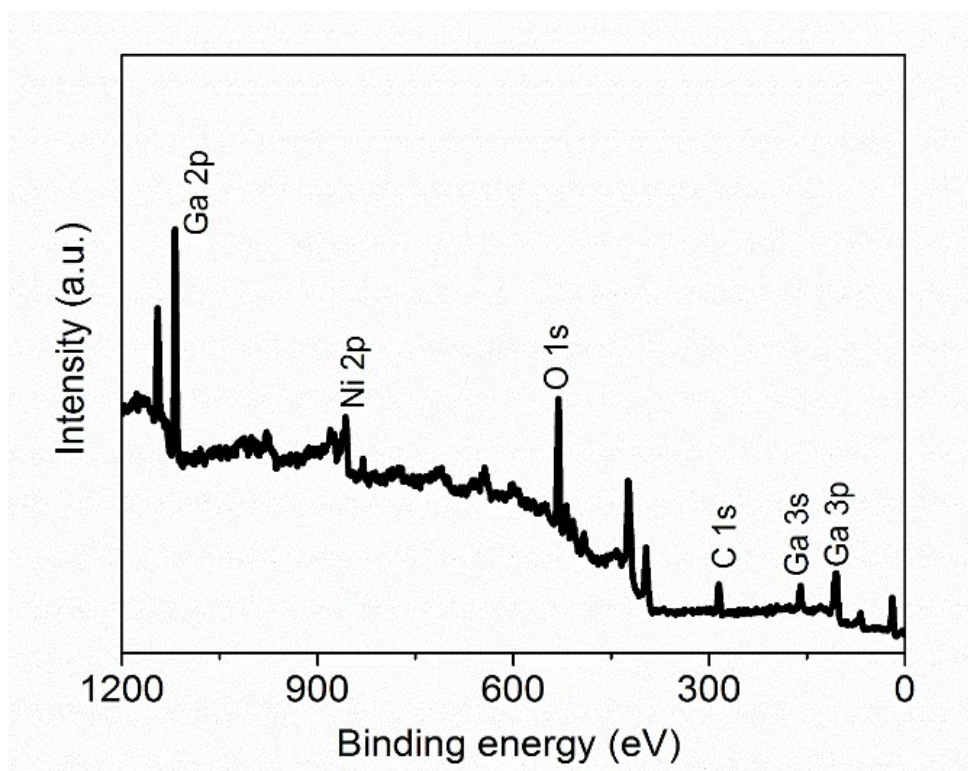

**Figure S3.** XPS general spectra of the NiGa<sub>2</sub>O<sub>4</sub> nanosheets.

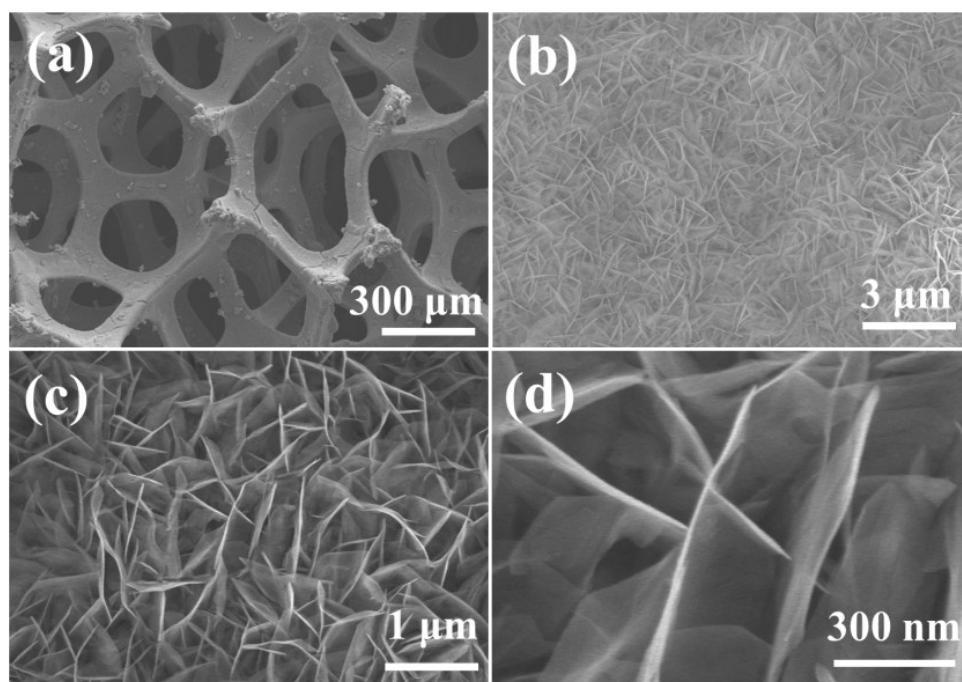

**Figure S4.** SEM images at high and low magnification of the NiGa<sub>2</sub>O<sub>4</sub>-4 h nanosheets.

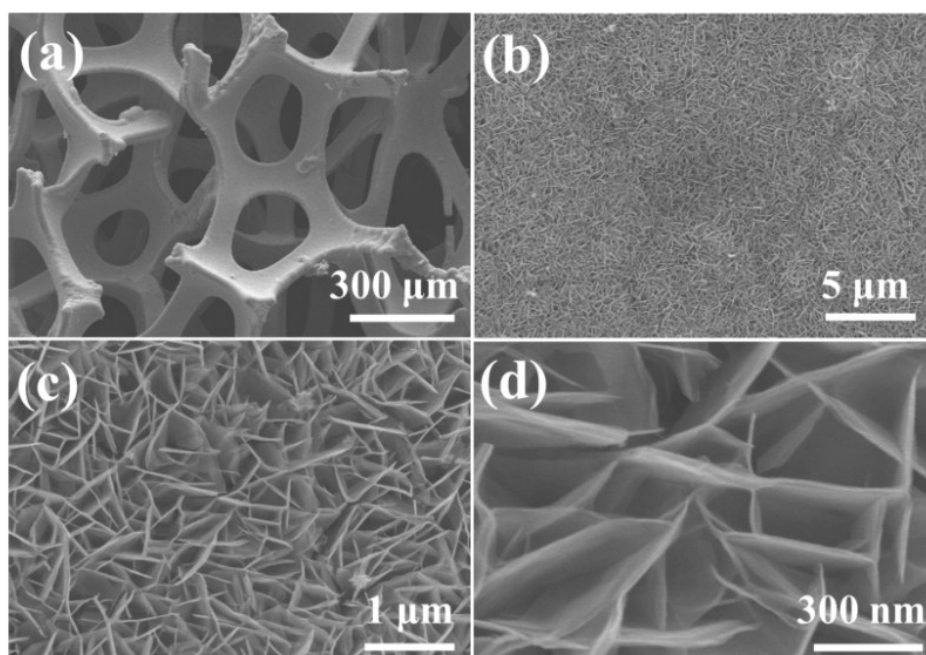

**Figure S5.** SEM images at high and low magnification of the  $\text{NiGa}_2\text{O}_4$ -8 h nanosheets.

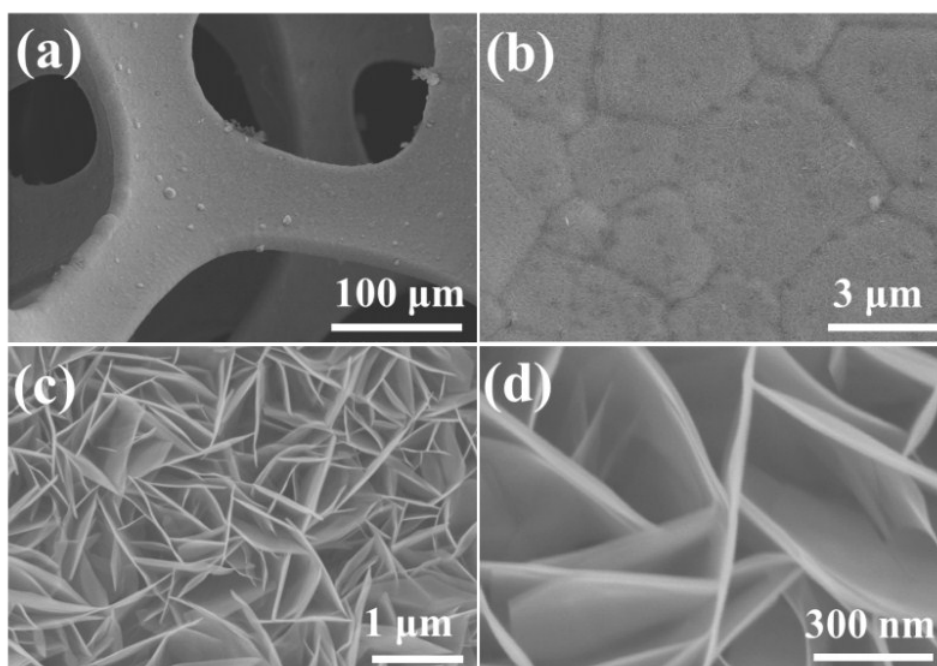

**Figure S6.** SEM images at high and low magnification of the  $\text{NiGa}_2\text{O}_4$ -12 h nanosheets.



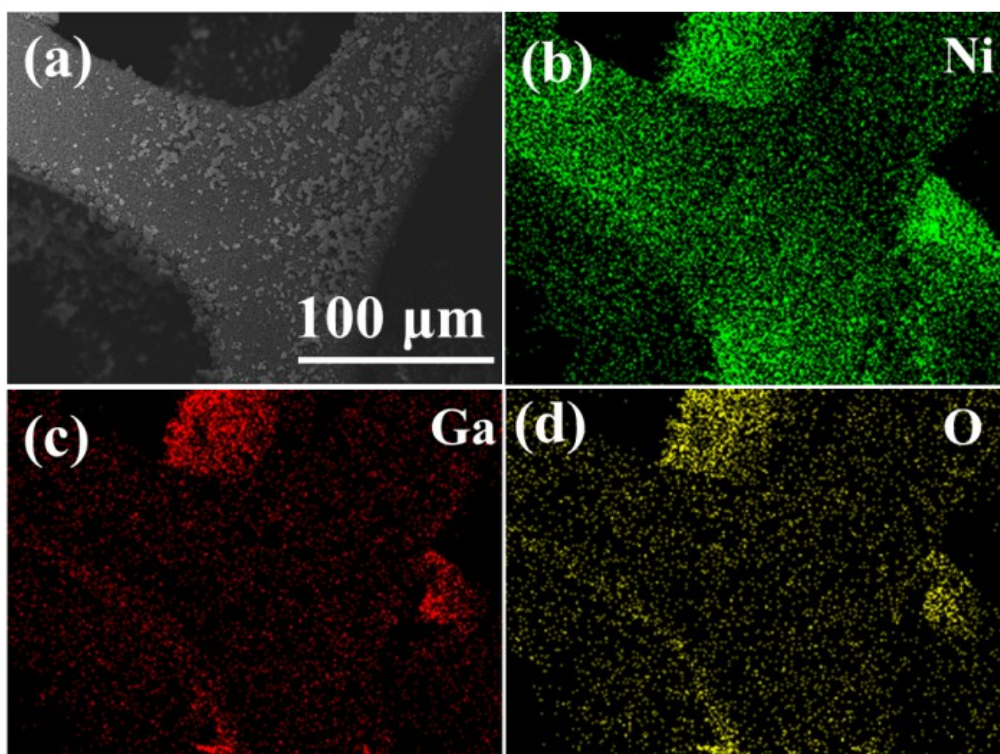

**Figure S7.** (a) SEM image of the NiGa<sub>2</sub>O<sub>4</sub>-12 h nanosheets on Ni foam and (b–d) the corresponding elemental mapping of Ni, Ga, and O.

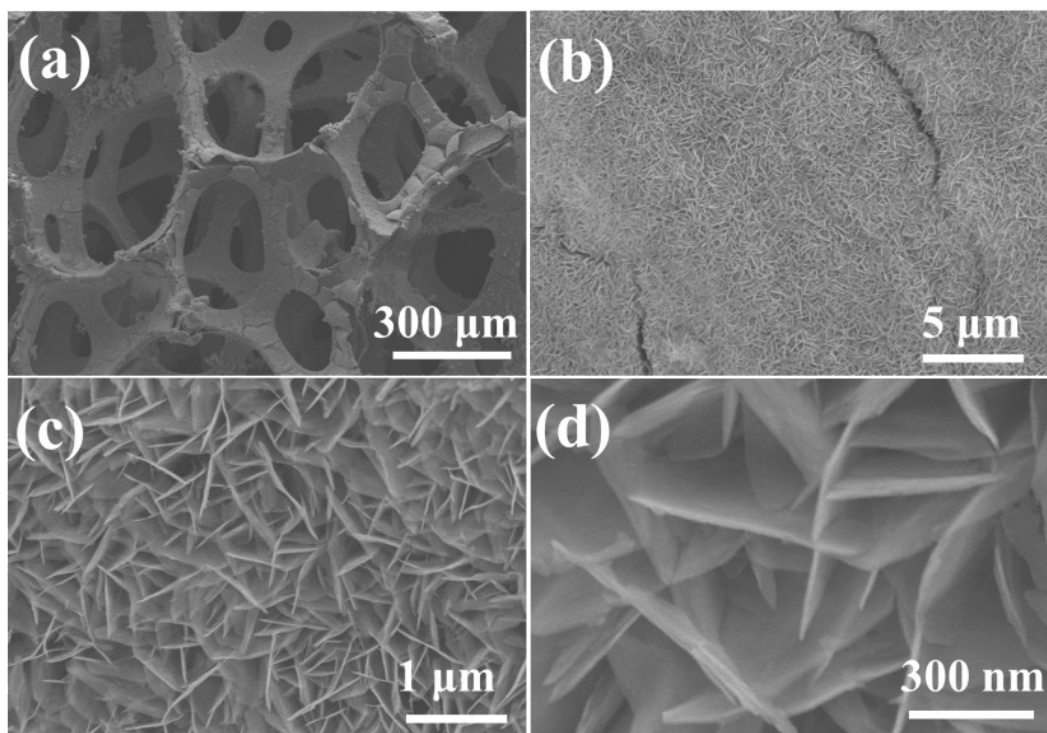

**Figure S8.** SEM images at high and low magnification of the NiGa<sub>2</sub>O<sub>4</sub>-16 h nanosheets.

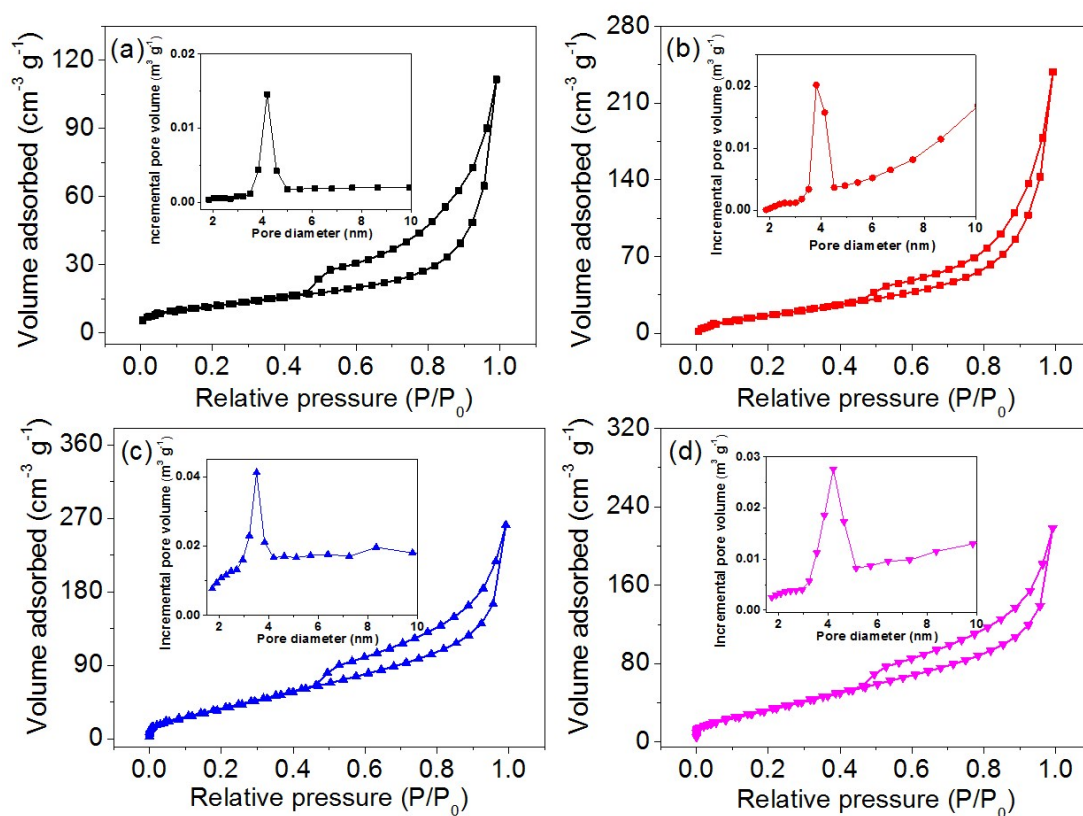

**Figure S9.** Nitrogen adsorption–desorption isotherms and pore size distribution curves of (a)  $\text{NiGa}_2\text{O}_4$ -4 h, (b)  $\text{NiGa}_2\text{O}_4$ -8 h, (c)  $\text{NiGa}_2\text{O}_4$ -12 h, and (d)  $\text{NiGa}_2\text{O}_4$ -16 h samples.

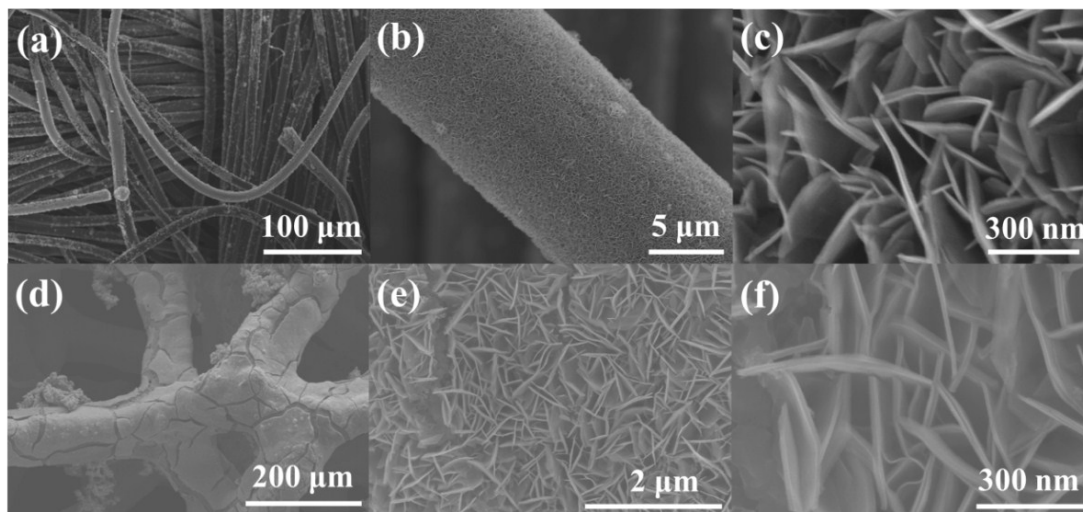

**Figure S10.** SEM images of the  $\text{NiGa}_2\text{O}_4$ -12 h on the different substrates: (a–c) C fiber; (d–f) Cu foam.



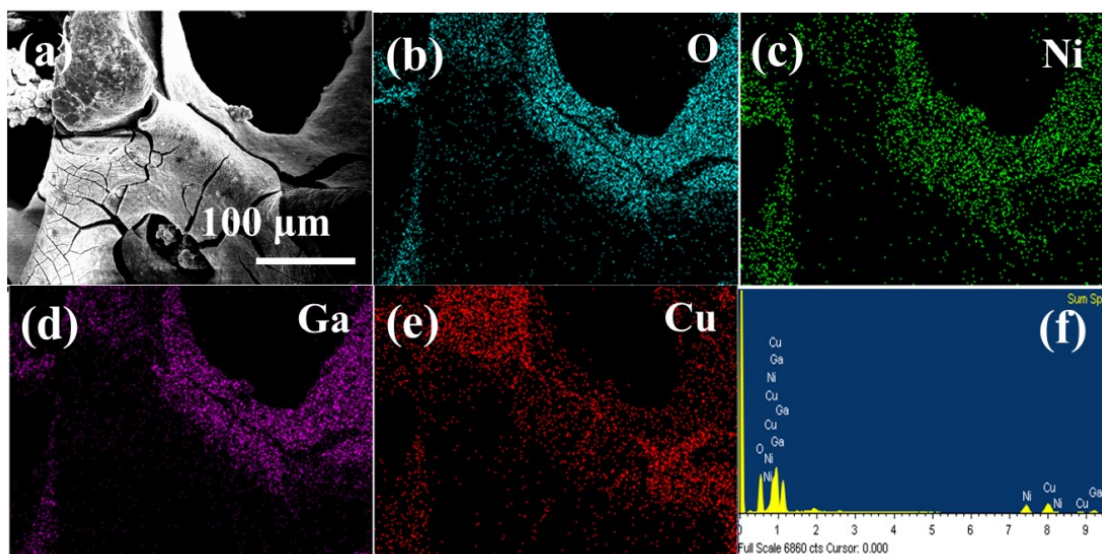

**Figure S11.** (a–e) Mapping results from the  $\text{NiGa}_2\text{O}_4$ -12 h nanosheets on Cu foam and (f) the corresponding EDS spectrum.

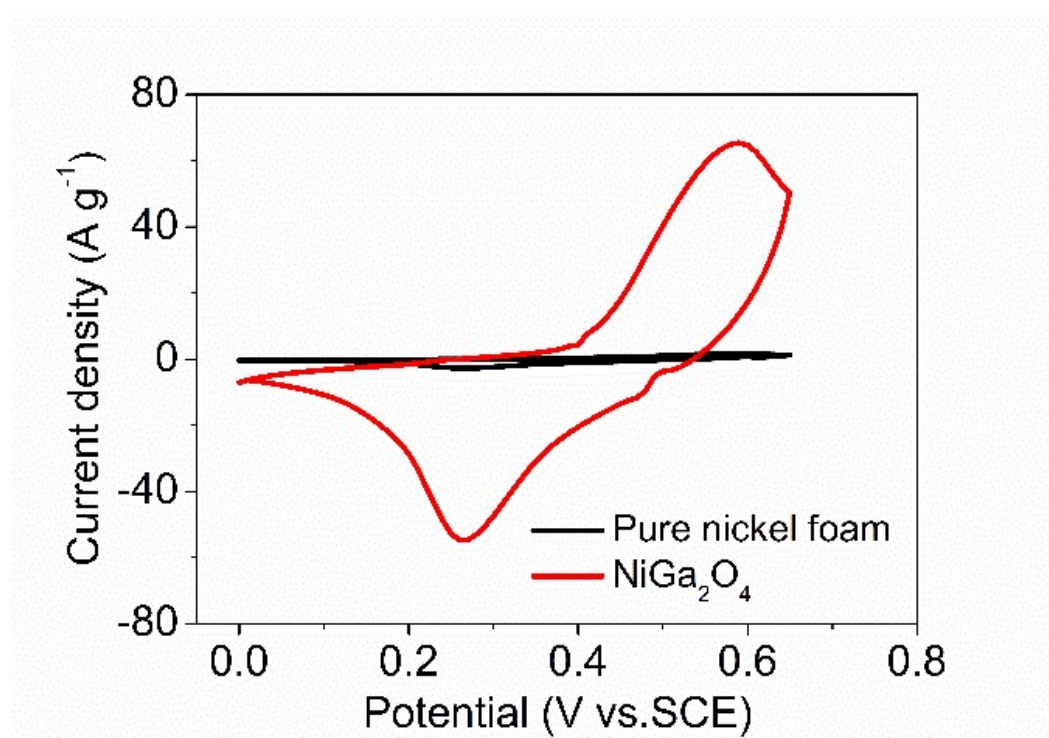

**Figure S12.** CV curves of the  $\text{NiGa}_2\text{O}_4$ -12 h nanosheets and pure Ni foam electrodes obtained at a scan rate of  $50 \text{ mV s}^{-1}$ .

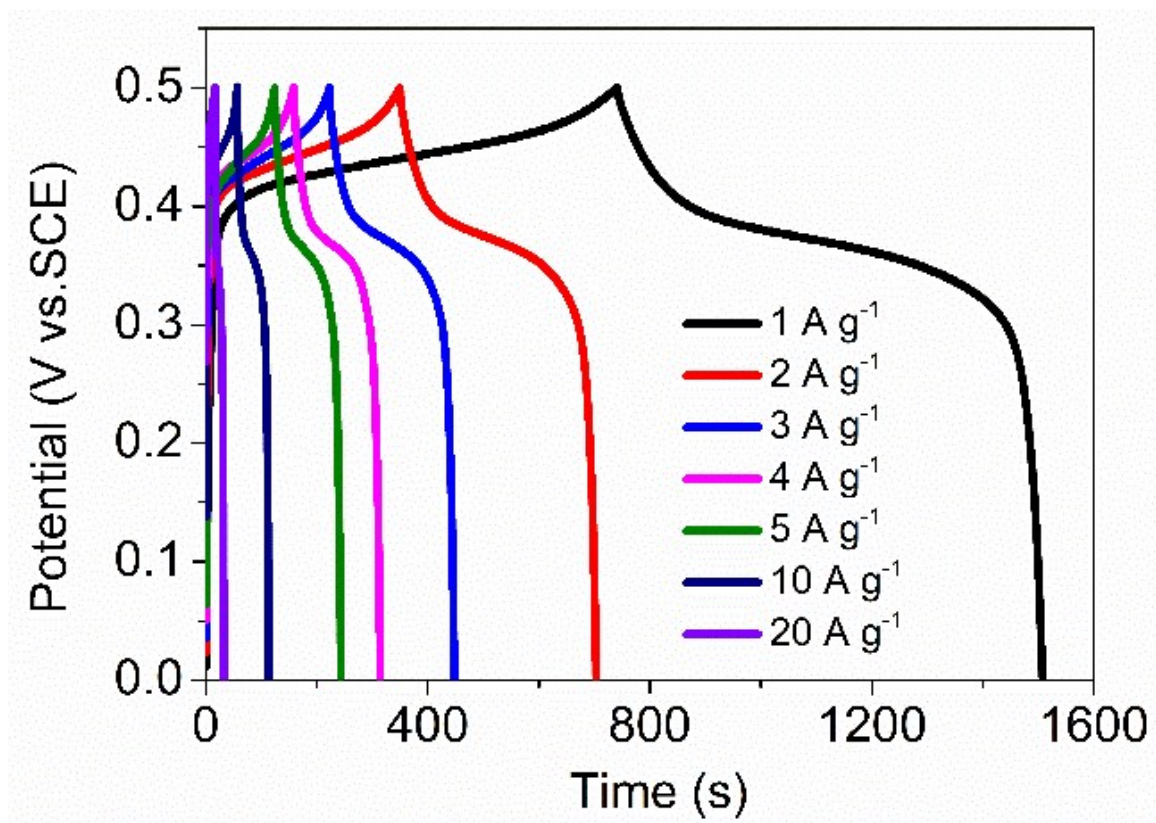

**Figure S13.** GCD curves of NiGa<sub>2</sub>O<sub>4</sub>-12 h sample at different current densities from 1 to 20 A g<sup>-1</sup>.

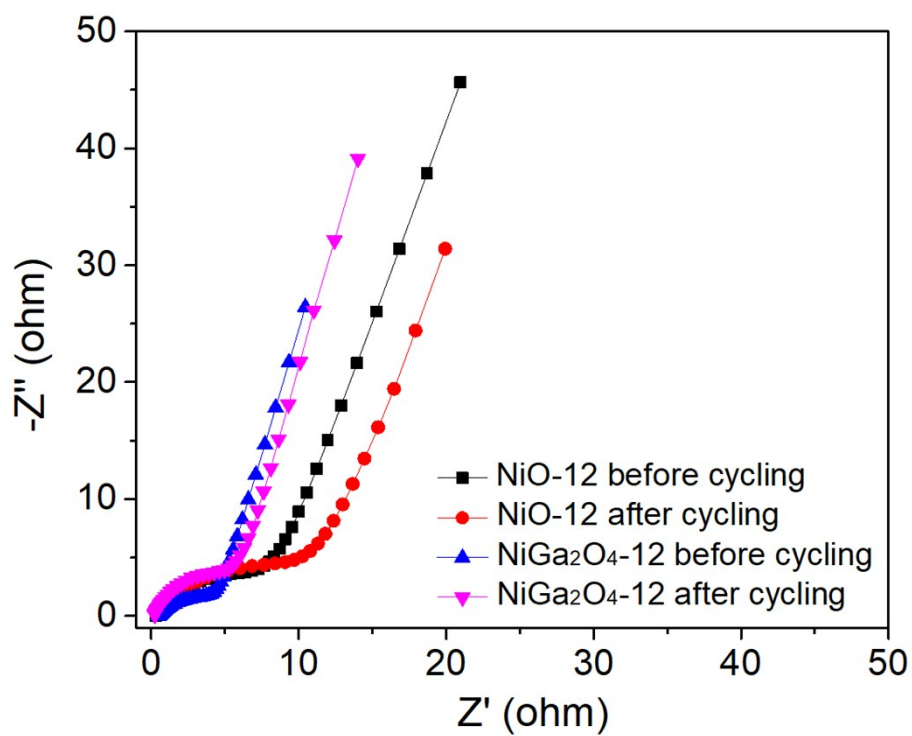

**Figure S14.** EIS curves of the NiO-12 h and NiGa<sub>2</sub>O<sub>4</sub>-12 h electrodes before and after the cycling test.



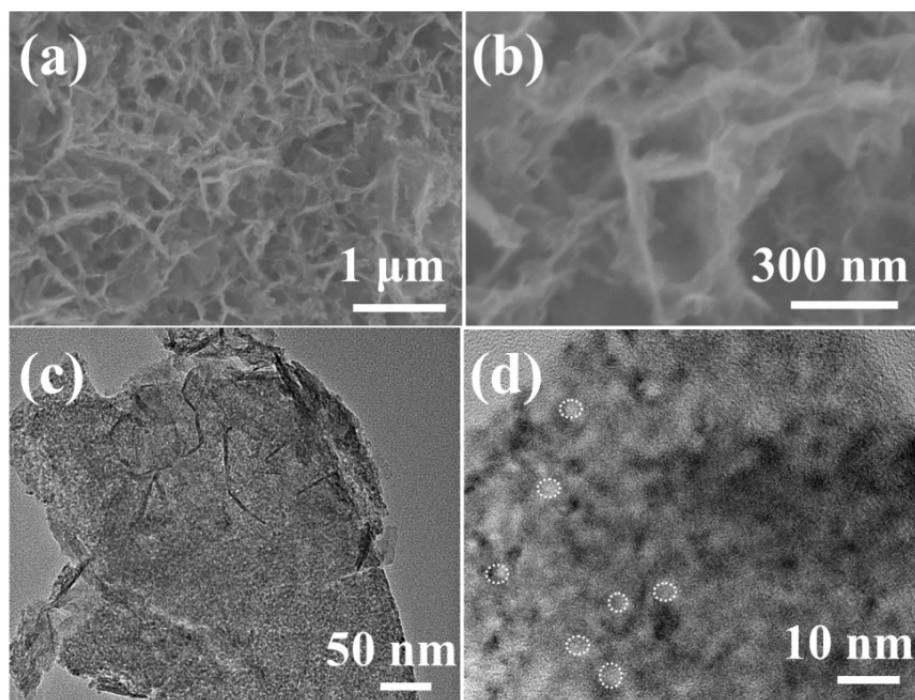

**Figure S15.** SEM and TEM images of  $\text{NiGa}_2\text{O}_4$ -12 h nanosheet electrode after cycle test: (a–b) SEM image; (c) low-magnification TEM image; (d) HRTEM image.

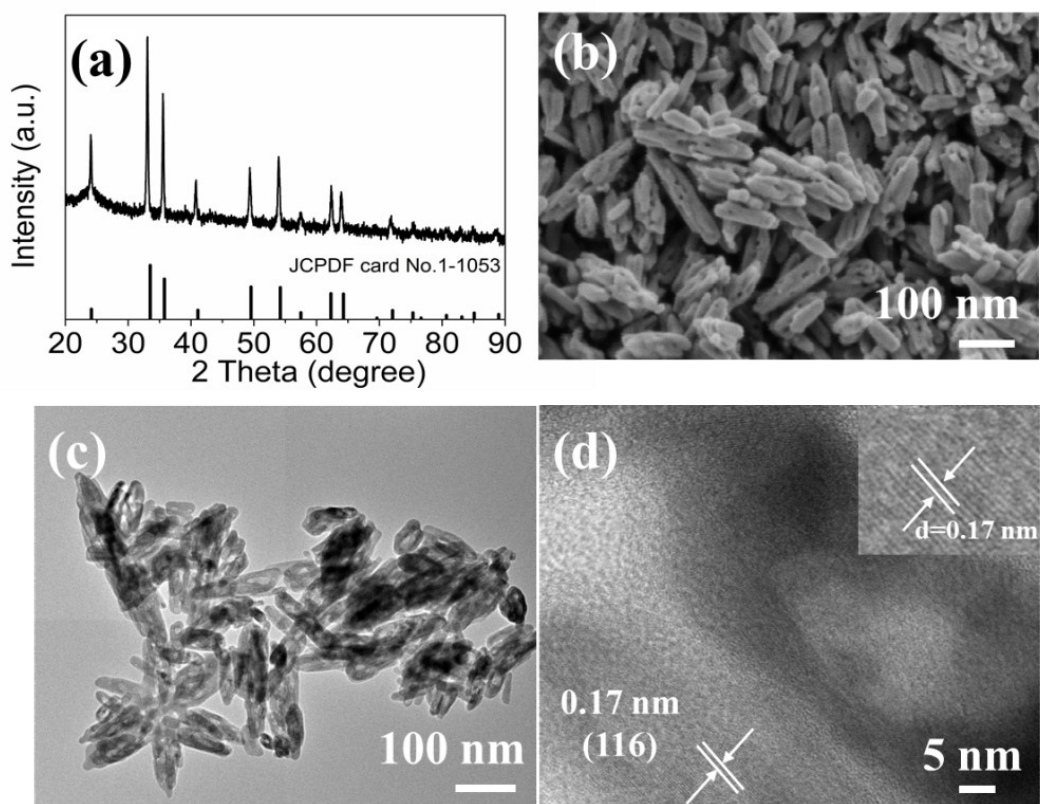

**Figure S16.** Structural and morphology characterization of spindle-like  $\text{Fe}_2\text{O}_3$ : (a) XRD pattern; (b) SEM image; (c–d) TEM images at different resolutions.

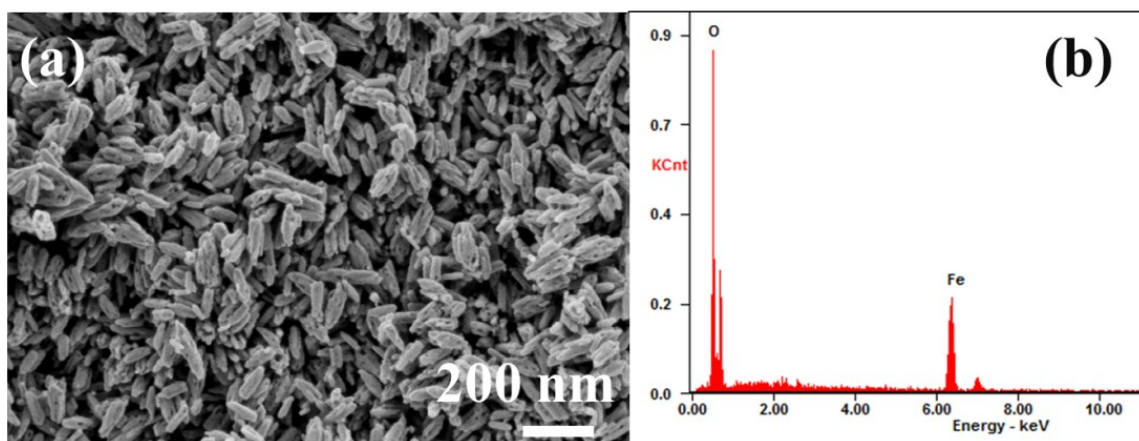

**Figure S17.** (a) SEM image of spindle-like  $\text{Fe}_2\text{O}_3$ ; (b) corresponding EDX spectra.

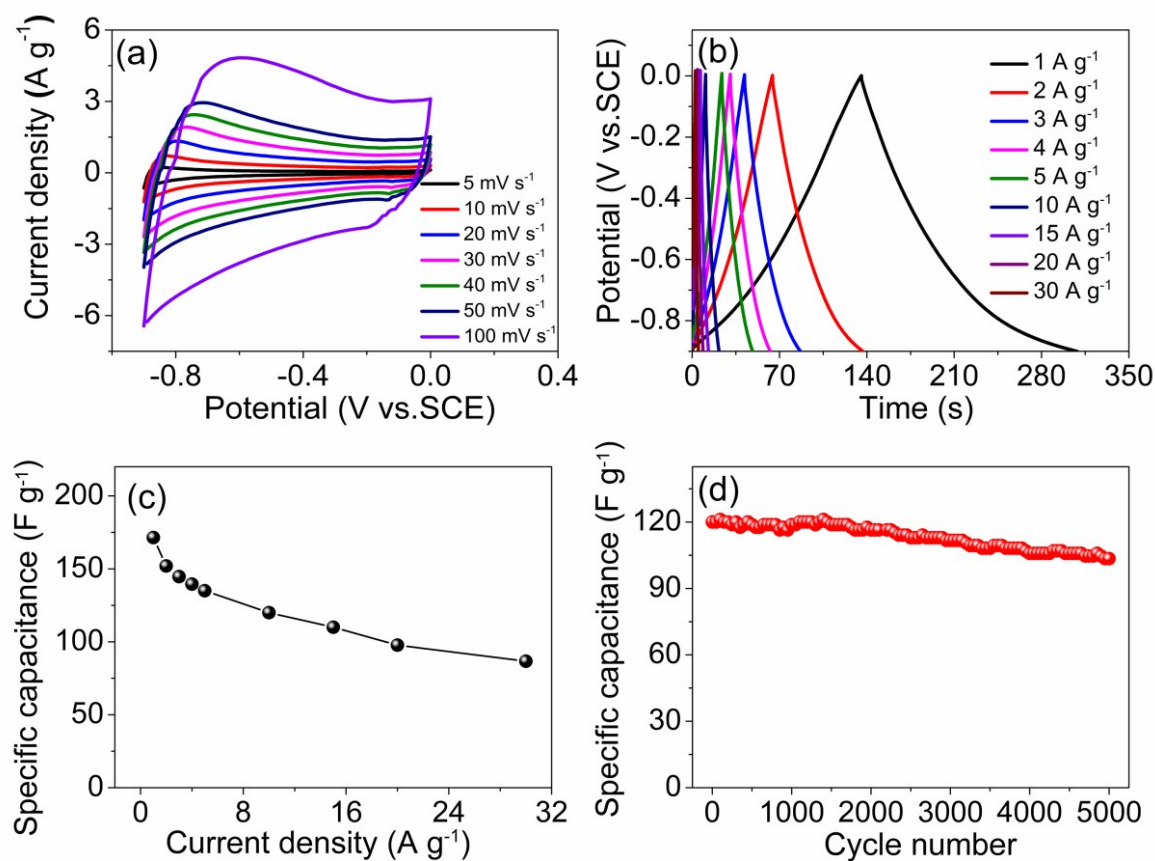

**Figure S18.** Electrochemical properties of  $\text{Fe}_2\text{O}_3$ : (a) CV curves. (b) Charge–discharge voltage profiles. (c) Specific capacitance at different current densities. (d) Cycling performance at a current density of 10  $\text{A g}^{-1}$ .

To study the electrochemical properties of the as-prepared spindle-like  $\text{Fe}_2\text{O}_3$ , the CV GCD cycling, and EIS measurements are performed in a 6 M KOH solution. **Figure S18a** shows the CV curves of  $\text{Fe}_2\text{O}_3$  electrode at various scan rates range from 5 to 100  $\text{mV S}^{-1}$  in the potential window of  $-0.9$ – $0$  V vs. SCE. The similar rectangular shape of CV curves is manifested by the Faradaic behavior of  $\text{Fe}_2\text{O}_3$ , which might arise from a reversible  $\text{Fe}^{3+}/\text{Fe}^{2+}$  couple. The peak current increases with an insignificant change in the CV shape, although the scan rate increases to 100  $\text{mV s}^{-1}$ , which reveals its good electrochemical reversibility and high rate capability. GCD measurements are conducted in a potential range of  $-0.9$ – $0$  V at various current densities ranging from 1 to 30  $\text{A g}^{-1}$ , as displayed in **Figure S18b**. The specific capacitance corresponded to 171.5  $\text{F g}^{-1}$  at a current density of 1  $\text{A g}^{-1}$  and remains at 86.7  $\text{F g}^{-1}$  at a high current density of 30  $\text{A g}^{-1}$  (**Figure S18c**). In particular, the stable specific capacitance of 103  $\text{F g}^{-1}$  can be retained for the spindle-like  $\text{Fe}_2\text{O}_3$  after 5,000 cycles at 10  $\text{A g}^{-1}$  with capacitance retention of almost 86% (**Figure S18d**), indicating a good electrochemical stability. The outstanding rate capability and electrochemical stability could be attributed to the one-dimensional spindle structure, which is in favor of fast ion diffusion and provides a short transport distance. In order to further confirm the excellent performance of the spindle-like  $\text{Fe}_2\text{O}_3$  electrode.

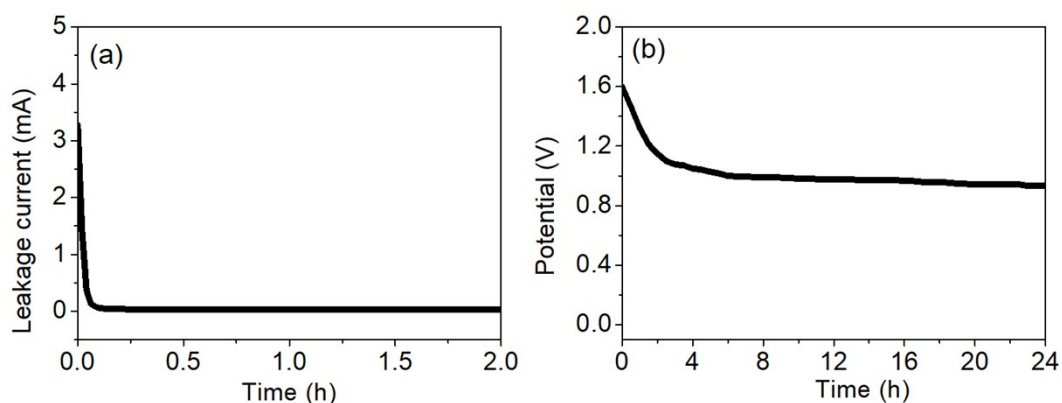

**Figure S19.** (a) Leakage current and (b) self-discharge curves of the NiGa<sub>2</sub>O<sub>4</sub>-12h/Fe<sub>2</sub>O<sub>3</sub> ASC device.

**Table S1.** Comparison of cyclic performances between the NiGa<sub>2</sub>O<sub>4</sub> and previous reports on Ni-based oxides/hydroxides/sulfides.

| Material                                                                                                      | The correspondin<br>g current<br>density | Capacitance<br>retention<br>(cycles) | Ref             |
|---------------------------------------------------------------------------------------------------------------|------------------------------------------|--------------------------------------|-----------------|
| Ni(OH) <sub>2</sub> nanosheets                                                                                | 5 A g <sup>-1</sup>                      | 75% (3,000)                          | S1              |
| Ni(OH) <sub>2</sub> /RGO/Ni(OH) <sub>2</sub> films                                                            | 20 mA cm <sup>-2</sup>                   | 95.3% (3,000)                        | S2              |
| CNT@Ni(OH) <sub>2</sub> nanosheets                                                                            | 8 A g <sup>-1</sup>                      | 92% (1,000)                          | S3              |
| MnCo-LDH@Ni(OH) <sub>2</sub> core-shell<br>heterostructures                                                   | 20 A g <sup>-1</sup>                     | 90.9% (5,000)                        | S4              |
| NiO nanotubes                                                                                                 | 2 A g <sup>-1</sup>                      | 93.2% (10,000)                       | S5              |
| α-Fe <sub>2</sub> O <sub>3</sub> nanorod/NiO nanosheet                                                        | 1 mA cm <sup>-2</sup>                    | 96.2% (3,000)                        | S6              |
| NiCo <sub>2</sub> O <sub>4</sub> nanowire@CoMoO <sub>4</sub> nanoplate                                        | 10 mA cm <sup>-2</sup>                   | 77.7% (1,000)                        | S7              |
| ZnCo <sub>2</sub> O <sub>4</sub> @Ni <sub>x</sub> Co <sub>2x</sub> (OH) <sub>6x</sub> core/shell<br>nanowires | 20 mA cm <sup>-2</sup>                   | 85.6% (2,000)                        | S8              |
| Ni-Co-S nanoparticles/graphene                                                                                | 6 A g <sup>-1</sup>                      | 90% (8,000)                          | S9              |
| NiCo <sub>2</sub> O <sub>4</sub> nanowire@Ni <sub>3</sub> S <sub>2</sub> nanosheet                            | 2 A g <sup>-1</sup>                      | 93.3% (10,000)                       | S10             |
| NiGa <sub>2</sub> O <sub>4</sub> nanosheets                                                                   | 20 A g <sup>-1</sup>                     | 102.4%<br>(10,000)                   | Present<br>work |



**Table S2.** Refined room-temperature structural parameters of NiO and NiGa<sub>2</sub>O<sub>4</sub> compounds as well as the calculated shortest bond lengths (Å) and the goodness of fit.

| NiO (cubic, space group <i>Fm-3m</i> (NO.225), Z = 4)                              |      |            |            |            |                            |
|------------------------------------------------------------------------------------|------|------------|------------|------------|----------------------------|
| <i>a</i> = <i>b</i> = <i>c</i> (Å)                                                 |      | 4.1921(15) | 4.1921(15) | 4.1921(15) |                            |
| $\alpha, \beta, \gamma(^{\circ})$                                                  |      | 90         | 90         | 90         |                            |
| Atom                                                                               | Site | <i>x</i>   | <i>y</i>   | <i>z</i>   | <i>B</i> (Å <sup>2</sup> ) |
| Ni                                                                                 | 4a   | 0.00       | 0.00       | 0.00       | 2.03(4)                    |
| O                                                                                  | 4b   | 0.50       | 0.50       | 0.50       | 1.98(9)                    |
| Shortest Ni-Ni: 2.9643(1) Å                                                        |      |            |            |            |                            |
| Shortest Ni-O: 2.0997(1) Å                                                         |      |            |            |            |                            |
| <i>R</i> <sub>B</sub> = 2.34, <i>R</i> <sub>F</sub> = 1.20, and $\chi^2$ = 1.80    |      |            |            |            |                            |
| NiGa <sub>2</sub> O <sub>4</sub> (cubic, space group <i>Fd-3m</i> (NO.227), Z = 8) |      |            |            |            |                            |
| <i>a</i> = <i>b</i> = <i>c</i> (Å)                                                 |      | 8.2977(81) | 8.2977(81) | 8.2977(81) |                            |
| $\alpha, \beta, \gamma(^{\circ})$                                                  |      | 90         | 90         | 90         |                            |
| Atom                                                                               | Site | <i>x</i>   | <i>y</i>   | <i>z</i>   | <i>B</i> (Å <sup>2</sup> ) |
| Ni                                                                                 | 16c  | 0.00       | 0.00       | 0.00       | 0.73(4)                    |
| Ga1                                                                                | 16c  | 0.00       | 0.00       | 0.00       | 1.06(5)                    |
| Ga2                                                                                | 8b   | 0.375      | 0.375      | 0.375      | 1.06(5)                    |
| O                                                                                  | 32e  | 0.253(1)   | 0.253(1)   | 0.253(1)   | 0.50(1)                    |
| Shortest Ni(Ga1)-Ni(Ga1): 2.9338(1) Å                                              |      |            |            |            |                            |
| Shortest Ni(Ga1)-O: 2.0961(1) Å                                                    |      |            |            |            |                            |
| Shortest Ga2-Ga2: 3.5931(1) Å                                                      |      |            |            |            |                            |
| Shortest Ga2-O: 1.7535(1) Å                                                        |      |            |            |            |                            |
| <i>R</i> <sub>B</sub> = 13.57, <i>R</i> <sub>F</sub> = 9.04, and $\chi^2$ = 1.21   |      |            |            |            |                            |

**Table S3.** Comparison of cyclic performances between the NiGa<sub>2</sub>O<sub>4</sub>//Fe<sub>2</sub>O<sub>3</sub> ASC device and the previous reports

| Device                                                            | Corresponding current density/scan rate | Capacitance retention (cycles) | Ref          |
|-------------------------------------------------------------------|-----------------------------------------|--------------------------------|--------------|
| MnCo <sub>2</sub> O <sub>4</sub> @Ni(OH) <sub>2</sub> //AC        | 6 A g <sup>-1</sup>                     | 90% (2,500)                    | S11          |
| N-doped cellulose @NiCo-LDH//N-doped cellulose                    | 10 A g <sup>-1</sup>                    | 74.4% (5,000)                  | S12          |
| (Ni, Co) <sub>0.85</sub> Se//graphene                             | 20 mA cm <sup>-2</sup>                  | 85% (10,000)                   | S13          |
| Cu <sub>2</sub> O/CuMoO <sub>4</sub> //AC                         | 5 A g <sup>-1</sup>                     | 86.6% (3,000)                  | S14          |
| CoNi-LDH//FeOOH                                                   | 100 mV s <sup>-1</sup>                  | 92.3% (3,000)                  | S15          |
| NiGa <sub>2</sub> O <sub>4</sub> //Fe <sub>2</sub> O <sub>3</sub> | 10 A g <sup>-1</sup>                    | 94.3% (10,000)                 | Present work |

## References

1. X. Xiong, D. Ding, D. Chen, G. Waller, Y. Bu, Z. Wang and M. Liu, *Nano Energy*, 2015, 11, 154-161.
2. S. Min, C. Zhao, Z. Zhang, G. Chen, X. Qian and Z. Guo, *J. Mater. Chem. A*, 2015, 3, 3641-3650.
3. H. Yi, H. Wang, Y. Jing, T. Peng, Y. Wang, J. Guo, Q. He, Z. Guo and X. Wang, *J. Mater. Chem. A*, 2015, 3, 19545-19555.
4. S. Liu, S. C. Lee, U. Patil, I. Shackery, S. Kang, K. Zhang, J. H. Park, K. Y. Chung and S. C. Jun, *J. Mater. Chem. A*, 2017, 5, 1043-1049.
5. F. Cao, G. Pan, X. Xia, P. Tang and H. Chen, *J. Power Sources*, 2014, 264, 161-167.
6. Y. Jiao, Y. Liu, B. Yin, S. Zhang, F. Qu and X. Wu, *Nano Energy*, 2014, 10, 90-98.
7. D. Cai, B. Liu, D. Wang, L. Wang, Y. Liu, H. Li, Y. Wang, Q. Li and T. Wang, *J. Mater. Chem. A*, 2014, 2, 4954-4960.
8. W. Fu, Y. Wang, W. Han, Z. Zhang, H. Zha and E. Xie, *J. Mater. Chem. A*, 2016, 4, 173-182.
9. J. Yang, C. Yu, X. Fan, S. Liang, S. Li, H. Huang, Z. Ling, C. Hao and J. Qiu, *Energy Environ. Sci.*, 2016, 9, 1299-1307.
10. B. Liu, D. Kong, Z. X. Huang, R. Mo, Y. Wang, Z. Han, C. Cheng and H. Y. Yang, *Nanoscale*, 2016, 8, 10686-10694.
11. Y. Zhao, L. Hu, S. Zhao and L. Wu, *Adv. Funct. Mater.*, 2016, 26, 4085-4093.
12. F. Lai, Y. E. Miao, L. Zuo, H. Lu, Y. Huang and T. Liu, *Small*, 2016, 12, 3235-3244.
13. C. Xia, Q. Jiang, C. Zhao, P. M. Beaujuge and H. N. Alshareef, *Nano Energy*, 2016, 24, 78-86.
14. D. Du, R. Lan, W. Xu, R. Beanland, H. Wang and S. Tao, *J. Mater. Chem. A*, 2016, 4, 17749-17756.
15. J. Chen, J. Xu, S. Zhou, N. Zhao and C.-P. Wong, *Nano Energy*, 2016, 21, 145-153.
